# Supplementary material
Source: PubMed Central journal article supplement (PMC10411948)
Supplement: NIHMS1920993-supplement-1.pdf [file NIHMS1920993-supplement-1.pdf]

## SUPPLEMENTAL FIGURE 1

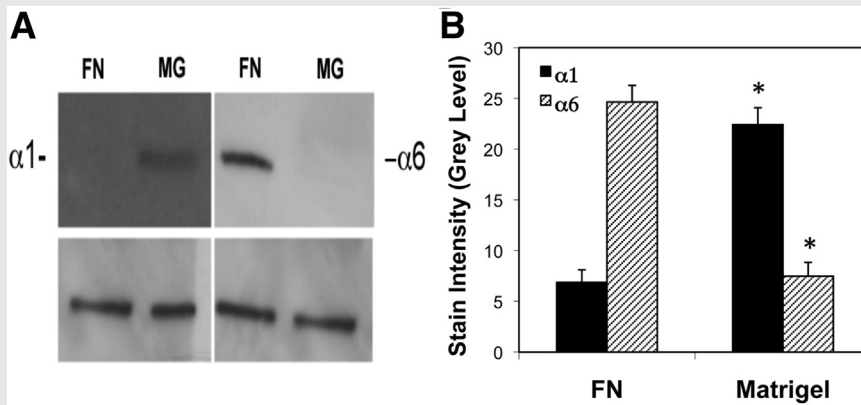

Detection of integrin switching. (A) HTR-8/SVneo cytotrophoblast cells were cultured for 24 hours on fibronectin (FN) or Matrigel (MG) and analyzed by Western blotting of integrin subunits, as previously described (57). Each lane contained 30  $\mu$ g of protein extract and was labeled with antibodies against the indicated proteins (upper panels), and were stripped and reprobbed for  $\beta$ -actin (lower panels). (B) Integrin expression was measured by quantitative immunocytochemistry of  $\alpha 1$  and  $\alpha 6$  in cells cultured on either FN or MG. \*  $P < .05$  vs. FN. Both analytical approaches reveal integrin switching induced by Matrigel.

Bolnick. Sildenafil and trophoblast invasion. Fertil Steril 2015.

## SUPPLEMENTAL FIGURE 2

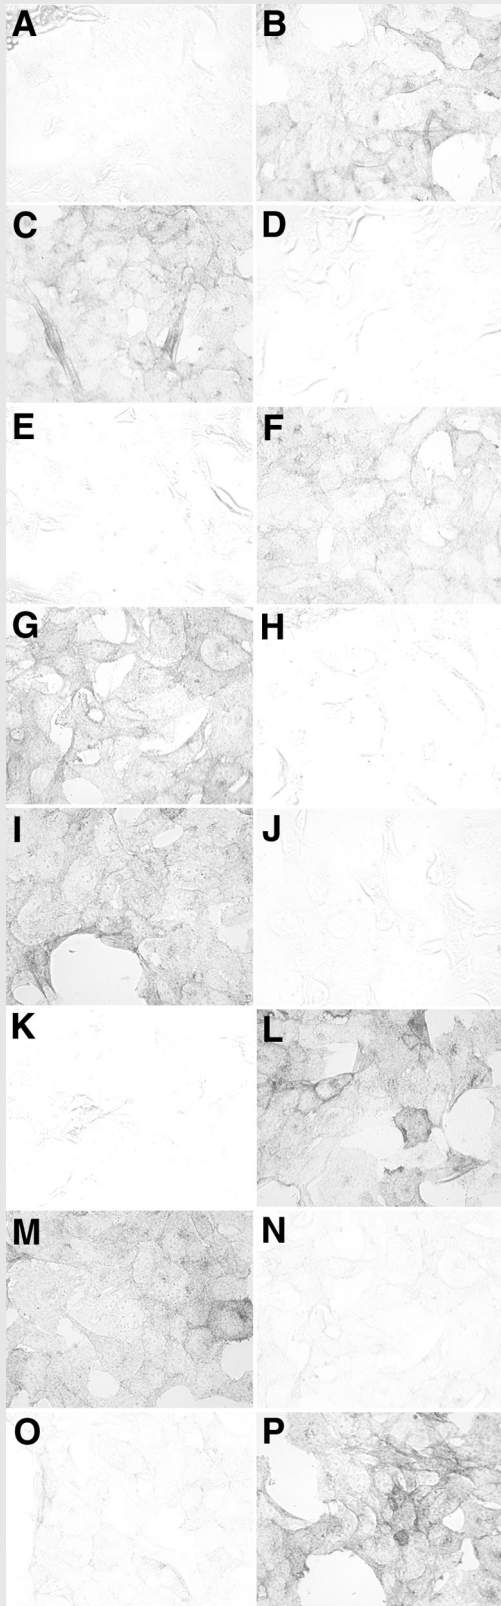

*Bolnick. Sildenafil and trophoblast invasion. Fertil Steril 2015.*

## SUPPLEMENTAL FIGURE 2 Continued

Expression of the  $\alpha 1$  and  $\alpha 6$  integrin subunits was determined as in Figure 2B. Examples of immunocytochemical staining of  $\alpha 1$  (A, C, E, G, I, K, M, O) and  $\alpha 6$  (B, D, F, H, J, L, N, P) in cells cultured with vehicle (A, B), 350 ng/mL sildenafil (C, D), combinations of sildenafil with L-NAME (E, F) or D-NAME (G, H), cGMP analogue (I, J), sildenafil with cGMP inhibitor (K, L), SNAP (M, N), or SNAP with cGMP inhibitor (O, P).

*Bolnick. Sildenafil and trophoblast invasion. Fertil Steril 2015.*
